# Supplementary material for: DDX54 regulates transcriptome dynamics during DNA damage response
Source: HighWire-hosted journal article supplement (doi:10.1101/gr.218438.116), 2017-06-08
Supplement: Supplemental_Table_S9.xlsx [file Supplemental_Table_S9.xlsx]

## Sheet: Sheet1
			Antibody	Manufacturer	Cat. No.	Dilution
		Western analysis of poly(A)+ RNA bound proteins	anti-DDX54	Santa Cruz Biotechnology	sc-101021	1:500
			anti-γ-H2AFX	Millipore	05-636	1:1000
			anti-XRCC6	Millipore	ABE558	1:1000
			anti-YBX1	Abcam	ab76149	1:5000
			anti-G3BP1	Millipore	07-1801	1:1000
			anti-FUS	Abcam	ab23439	1:1000
			anti-EWSR1	Abcam	ab81971	1:250
			anti-TUBB	Sigma	T8328	1:3000
			anti-VINC	Sigma	V4505	1:10000
		Western analysis of DDX54 co-immunoprecipitates	anti-U2AF1	Bethyl Laboratories	A302-079A	1:1000
			anti-SF3B1	Bethyl Laboratories	A300-996A	1:1000
			anti-DDX42	Bethyl Laboratories	A303-353A	1:1000
			anti-DDX41	Bethyl Laboratories	A301-050A	1:1000
			anti-DHX8	Bethyl Laboratories	A300-624A	1:1000
			anti-CDC40	Bethyl Laboratories	A303-699A	1:1000
			anti-FLAG-HRP	Sigma Aldrich	A8592	1:1000
			anti-HNRNPH1	Abcam	ab10374	1:20000
		Fluorescence microscopy	anti-DDX54	Santa Cruz Biotechnology	sc-101021	1:250
			anti-HA.11	Covance	MMS-101R	1:1000
